# Supplementary material
Source: PubMed Central journal article supplement (PMC6153039)
Supplement: NIHMS1500461-supplement-SupplementalData.pdf [file NIHMS1500461-supplement-SupplementalData.pdf]

## Supplementary Material

| HCl Concentration (M) | $K_d$ : Y + TBP resin (mL/g) | $K_d$ : Zr + TBP resin (mL/g) | $K_d$ : Y + UTEVA resin (mL/g) | $K_d$ : Zr + UTEVA resin (mL/g) |
|-----------------------|------------------------------|-------------------------------|--------------------------------|---------------------------------|
| $0.27 \pm 0.16$       | $0.05 \pm 0.95$              | $0.43 \pm 0.45$               | $-0.30 \pm 0.88$               | $1.18 \pm 0.45$                 |
| $1.23 \pm 0.16$       | $-0.04 \pm 1.03$             | $0.13 \pm 0.50$               | $-0.31 \pm 0.92$               | $0.28 \pm 0.44$                 |
| $3.15 \pm 0.16$       | $-0.60 \pm 0.98$             | $-0.24 \pm 0.48$              | $-0.30 \pm 0.80$               | $-0.14 \pm 0.37$                |
| $5.07 \pm 0.16$       | $-0.21 \pm 0.78$             | $0.39 \pm 0.38$               | $0.08 \pm 0.90$                | $1.69 \pm 0.44$                 |
| $6.99 \pm 0.16$       | $-0.14 \pm 0.92$             | $181 \pm 14$                  | $-0.11 \pm 0.87$               | $213 \pm 14$                    |
| $8.92 \pm 0.16$       | $-0.60 \pm 0.98$             | $2920 \pm 1390$               | $-0.26 \pm 0.94$               | $4840 \pm 2220$                 |
| $10.81 \pm 0.16$      | $-0.20 \pm 0.85$             | $4760 \pm 1970$               | $-0.03 \pm 0.91$               | $2410 \pm ^{89}0$               |

**Supplementary Table 1.** Tabulated equilibrium coefficients ( $K_d$ ) for Y and Zr on TBP and UTEVA resins.

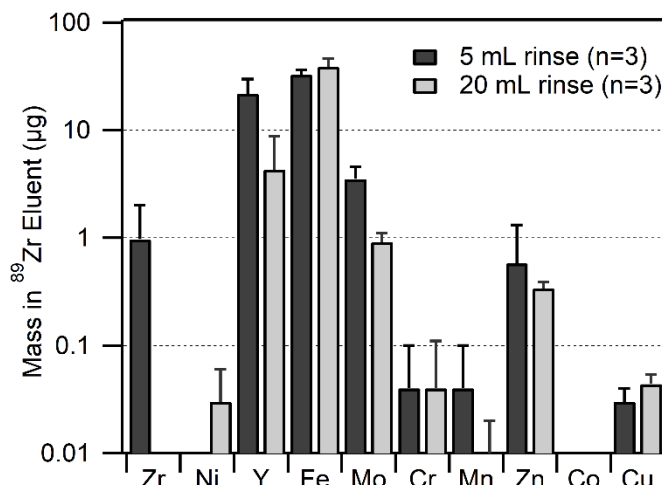

**Supplementary Figure 1.** Total trace metal impurities in <sup>89</sup>Zr-chloride products, as measured by MP-AES as a function of column rinsing volume prior to elution. A significant reduction in yttrium impurity is observed when rinsing with 20 mL of 9.6M HCl compared with a 5 mL rinse volume. Values represent mean  $\pm$  standard deviation for three <sup>89</sup>Zr-chloride productions from full <sup>nat</sup>Y target masses.

| Production | Zr (µg)         | Ni (µg)         | Y (µg)        | Fe (µg)        | Mo (µg)         | Cr (µg)         | Mn (µg)           | Zn (µg)         | Co (µg)         | Cu (µg)           |
|------------|-----------------|-----------------|---------------|----------------|-----------------|-----------------|-------------------|-----------------|-----------------|-------------------|
| 1          | $0.07 \pm 0.33$ | $0.01 \pm 0.03$ | $9.5 \pm 1.0$ | $33.6 \pm 1.7$ | $0.77 \pm 0.04$ | $0.00 \pm 0.01$ | $0.001 \pm 0.003$ | $0.35 \pm 0.02$ | $0.00 \pm 0.01$ | $0.051 \pm 0.006$ |
| 2          | $0.00 \pm 0.33$ | $0.02 \pm 0.03$ | $1.5 \pm 0.3$ | $47.5 \pm 2.4$ | $1.13 \pm 0.06$ | $0.00 \pm 0.01$ | $0.007 \pm 0.03$  | $0.30 \pm 0.02$ | $0.00 \pm 0.01$ | $0.037 \pm 0.006$ |
| 3          | $0.00 \pm 0.33$ | $0.06 \pm 0.03$ | $1.8 \pm 0.2$ | $35.2 \pm 1.8$ | $0.83 \pm 0.05$ | $0.12 \pm 0.02$ | $0.011 \pm 0.003$ | $0.39 \pm 0.02$ | $0.00 \pm 0.01$ | $0.043 \pm 0.006$ |
| Avg.       | $0.02 \pm 0.37$ | $0.03 \pm 0.03$ | $4.3 \pm 4.5$ | $38.8 \pm 7.7$ | $0.91 \pm 0.20$ | $0.04 \pm 0.07$ | $0.006 \pm 0.005$ | $0.34 \pm 0.05$ | $0.00 \pm 0.01$ | $0.044 \pm 0.008$ |

**Supplementary Table 2.** Trace metal impurities for three TBP resin-isolations of <sup>89</sup>Zr-chloride. Full <sup>nat</sup>Y target masses were employed for these production runs, and 10% of the isolated product was used for trace metal analysis. Values specified in this table are calculated to be the total metal mass burden for the separated product.

| Element        | TBP resin                              | Hydroxamate resin                                        | Hydroxamate resin                     |
|----------------|----------------------------------------|----------------------------------------------------------|---------------------------------------|
|                | separated<br><sup>89</sup> Zr-chloride | separated,<br>QMA converted<br><sup>89</sup> Zr-chloride | separated<br><sup>89</sup> Zr-Oxalate |
| <b>Zr (μg)</b> | 0.02 ± 0.37                            | 0.94 ± 0.31                                              | BDL                                   |
| <b>Ni (μg)</b> | 0.03 ± 0.03                            | BDL                                                      | BDL                                   |
| <b>Y (μg)</b>  | 4.3 ± 4.5                              | 1.78 ± 1.82                                              | 1.82 ± 0.31                           |
| <b>Fe (μg)</b> | 38.8 ± 7.7                             | BDL                                                      | 0.35 ± 0.61                           |
| <b>Mo (μg)</b> | 0.91 ± 0.20                            | 0.42 ± 0.24                                              | N/A                                   |
| <b>Cr (μg)</b> | 0.04 ± 0.07                            | BDL                                                      | N/A                                   |
| <b>Mn (μg)</b> | 0.006 ± 0.005                          | BDL                                                      | BDL                                   |
| <b>Zn (μg)</b> | 0.34 ± 0.05                            | 0.25 ± 0.05                                              | 0.40 ± 0.70                           |
| <b>Co (μg)</b> | 0.00 ± 0.01                            | 0.29 ± 0.07                                              | BDL                                   |
| <b>Cu (μg)</b> | 0.044 ± 0.008                          | BDL                                                      | N/A                                   |

**Supplementary Table 3.** Total trace metal impurities in <sup>89</sup>Zr products, as measured by MP-AES. Metal impurities below limits of detection are labeled “BDL,” and metals which were not measured are marked “N/A.” Values represent mean ± standard, corrected for the fraction of the total production activity tested. TBP resin-based isolations of <sup>89</sup>Zr-chloride (n = 3) and hydroxamate resin-based isolations of <sup>89</sup>Zr-oxalate (n = 3) were performed from full <sup>nat</sup>Y target masses. Samples converted from <sup>89</sup>Zr-chloride to <sup>89</sup>Zr-oxalate (n = 3) were obtained from an aliquot of a full production run.
